# Supplementary material
Source: PubMed Central journal article supplement (PMC2689792)
Supplement: en.2008-1342_1.pdf [file en.2008-1342_1.pdf]

Figure S1

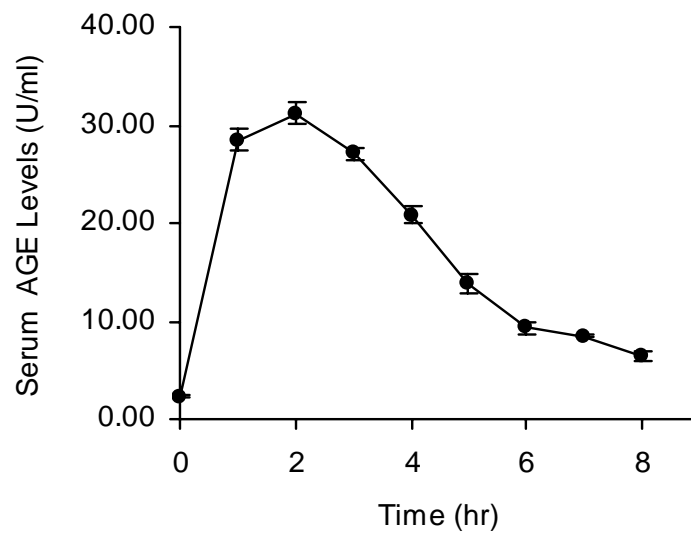

Figure S1. Time course of the AGE-BSA levels in serum following one does injection of AGE-BSA (24 U/g body weight) to mouse.
